# Supplementary material for: Validating Accuracy of an Internet-Based Application against USDA Computerized Nutrition Data System for Research on Essential Nutrients among Social-Ethnic Diets for the E-Health Era
Source: MDPI journal article supplement (doi:10.3390/nu14153168), 2022-07-31
Supplement: s1 [file s1]

**Supplementary Table S1:** Bias and agreement between internet-based applications and Nutrition Data System for Research per domains of caloric ranges, energy nutrients, and various diets for major nutrients (N=131).

| Parameters (n)          | Calories, kcal                         | Carb, g                               | Protein, g                             | Fat, g                                 | Sat Fat, g                             | Cholesterol, g                        | Fiber, g                              |
|-------------------------|----------------------------------------|---------------------------------------|----------------------------------------|----------------------------------------|----------------------------------------|---------------------------------------|---------------------------------------|
|                         | <i>r</i> (95%CI)                       | <i>r</i> (95%CI)                      | <i>r</i> (95%CI)                       | <i>r</i> (95%CI)                       | <i>r</i> (95%CI)                       | <i>r</i> (95%CI)                      | <i>r</i> (95%CI)                      |
|                         | %diff M ± SD                           | %diff M ± SD                          | %diff M ± SD                           | %diff M ± SD                           | %diff M ± SD                           | %diff M ± SD                          | %diff M ± SD                          |
| <b>Caloric Ranges</b>   |                                        |                                       |                                        |                                        |                                        |                                       |                                       |
| <1000 (63)              | 0.75** (0.62-0.84)<br>-4.26** ± 10.01  | 0.85** (0.77-0.91)<br>-0.70** ± 12.55 | 0.80** (0.68-0.87)<br>-6.27** ± 11.35  | 0.75** (0.61-0.84)<br>-10.58** ± 13.73 | 0.68** (0.53-0.79)<br>-14.81** ± 15.63 | 0.95** (0.91-0.97)<br>-6.37** ± 16.24 | 0.89** (0.83-0.93)<br>8.23** ± 19.49  |
| 1000-2000 (50)          | 0.76** (0.60-0.85)<br>-4.10** ± 11.67  | 0.94** (0.89-0.96)<br>5.15** ± 11.60  | 0.92** (0.86-0.95)<br>-3.03** ± 9.04   | 0.56** (0.33-0.72)<br>-14.34** ± 17.19 | 0.68** (0.50-0.8)<br>-12.52** ± 16.04  | 0.92** (0.86-0.95)<br>-2.08** ± 10.57 | 0.98** (0.97-0.99)<br>10.86** ± 10.64 |
| >2000 (18)              | 0.57* (0.14-0.82)<br>-11.56 ± 25.71    | 0.55* (0.15-0.8)<br>-9.98 ± 29.51     | 0.65* (0.29-0.85)<br>-12.03* ± 23.09   | 0.73** (0.41-0.89)<br>-16.16** ± 23.74 | 0.76** (0.48-0.9)<br>-13.62** ± 22.15  | 0.70** (0.37-0.87)<br>-7.27 ± 23.06   | 0.43 (-0.02-0.73)<br>-10.21 ± 35.72   |
| <b>Energy Nutrients</b> |                                        |                                       |                                        |                                        |                                        |                                       |                                       |
| Fat                     | 0.61** (0.43-0.74)<br>-12.37** ± 15.54 | 0.56** (0.37-0.71)<br>-3.40 ± 20.26   | 0.70** (0.55-0.8)<br>-9.80** ± 15.08   | -                                      | 0.70** (0.56-0.81)<br>-24.48** ± 14.86 | 0.74** (0.61-0.84)<br>-9.84** ± 16.43 | 0.60** (0.41-0.74)<br>3.39 ± 24.82    |
| Protein                 | 0.76** (0.64-0.85)<br>-9.64** ± 15.20  | 0.73** (0.59-0.82)<br>-4.86* ± 18.89  | -                                      | 0.80** (0.69-0.87)<br>-14.55** ± 14.59 | 0.81** (0.71-0.88)<br>-17.51** ± 14.30 | 0.84** (0.75-0.9)<br>-9.20** ± 17.09  | 0.73** (0.59-0.82)<br>-0.93 ± 22.80   |
| Carbohydrate            | 0.71** (0.58-0.82)<br>-11.47** ± 15.50 | -                                     | 0.78** (0.67-0.86)<br>-10.03** ± 12.60 | 0.70** (0.55-0.8)<br>-15.76** ± 18.42  | 0.73** (0.59-0.82)<br>-16.78** ± 16.25 | 0.80** (0.69-0.87)<br>-4.51* ± 13.47  | 0.78** (0.66-0.86)<br>-2.58 ± 21.81   |
| <b>Diet Types</b>       |                                        |                                       |                                        |                                        |                                        |                                       |                                       |
| Pure Liquid (8)         | 0.99** (0.93-1.0)<br>-0.38 ± 7.32      | 1.0** (0.99-1.0)<br>2.88 ± 4.52       | 0.79* (0.18-0.96)<br>-9.53 ± 17.28     | 0.79* (0.19-0.96)<br>-0.66 ± 17.65     | 0.57 (-0.23-0.91)<br>-12.82 ± 21.72    | 0.23 (-0.57-0.8)<br>-27.99** ± 30.20  | 1.00** (0.97-1.0)<br>11.69 ± 32.54    |
| Convenient Diet (30)    | 0.81** (0.63-0.9)<br>8.30** ± 12.81    | 0.85** (0.71-0.93)<br>4.18** ± 9.94   | 0.94** (0.88-0.97)<br>1.85 ± 10.41     | 0.59** (0.29-0.78)<br>-23.65** ± 20.16 | 0.78** (0.58-0.89)<br>-19.50** ± 22.79 | 0.96** (0.92-0.98)<br>-5.52* ± 13.23  | 0.74** (0.51-0.87)<br>18.46** ± 15.91 |
| Canned Food (10)        | 0.15 (-0.53-0.71)<br>-6.83* ± 9.16     | 0.95** (0.79-0.99)<br>5.60** ± 4.15   | 1.0** (0.98-1.0)<br>3.84** ± 4.35      | 0.29 (-0.42-0.78)<br>-27.27** ± 17.56  | 0.04 (-0.61-0.65)<br>-29.80** ± 14.44  | 0.78* (0.31-0.95)<br>-17.74** ± 3.92  | 0.99** (0.96-1.0)<br>29.33** ± 16.50  |
| High School (10)        | 0.95** (0.8-0.99)<br>0.55 ± 3.84       | 0.97** (0.89-0.99)<br>5.50** ± 2.64   | 0.89** (0.6-0.97)<br>0.42 ± 8.33       | 0.93** (0.74-0.98)<br>-5.32* ± 5.35    | 0.89** (0.61-0.98)<br>2.22 ± 8.31      | 0.77* (0.27-0.94)<br>2.72 ± 8.48      | 0.85* (0.48-0.96)<br>12.77** ± 6.58   |
| Fast Food (10)          | -0.22 (-0.75-0.48)<br>-18.61** ± 14.93 | 0.11 (-0.56-0.69)<br>1.43 ± 16.78     | -0.03 (-0.65-0.61)<br>1.30 ± 15.94     | 0.21 (-0.48-0.74)<br>-38.36** ± 18.54  | 0.23 (-0.46-0.75)<br>-30.94** ± 18.11  | 0.76* (0.25-0.94)<br>-1.55 ± 14.77    | -0.39 (-0.82-0.32)<br>13.29** ± 17.43 |
| Ethnic Food (71)        | 0.95** (0.92-0.97)<br>-3.22** ± 9.90   | 0.93** (0.88-0.95)<br>2.01 ± 13.96    | 0.96** (0.93-0.97)<br>-7.40** ± 8.35   | 0.92** (0.88-0.95)<br>-9.14** ± 8.53   | 0.91** (0.86-0.94)<br>-11.73** ± 11.65 | 0.96** (0.93-0.97)<br>-1.05 ± 7.86    | 0.97** (0.96-0.98)<br>5.39** ± 12.12  |
| Western Diet (38)       | 0.85** (0.72-0.92)<br>-1.90 ± 9.66     | 0.77** (0.6-0.87)<br>2.86* ± 14.24    | 0.86** (0.74-0.92)<br>-5.15** ± 7.57   | 0.84** (0.72-0.92)<br>-6.53** ± 9.03   | 0.83** (0.69-0.91)<br>-6.10** ± 11.27  | 0.84** (0.71-0.91)<br>-0.59 ± 8.10    | 0.89** (0.8-0.94)<br>5.37** ± 13.40   |
| Mexican (10)            | 0.66* (0.06-0.91)<br>3.40 ± 11.83      | 0.62 (-0.01-0.9)<br>13.04* ± 17.65    | 0.91** (0.66-0.98)<br>-5.01** ± 3.45   | 0.83* (0.42-0.96)<br>-6.59 ± 11.83     | 0.78* (0.29-0.94)<br>-6.45 ± 11.52     | 0.49 (-0.2-0.86)<br>-3.49** ± 3.26    | 0.83* (0.43-0.96)<br>15.54** ± 8.92   |
| Italian (10)            | 0.56 (-0.11-0.88)<br>-1.31 ± 3.10      | 0.94** (0.77-0.99)<br>4.46** ± 1.98   | -0.17 (-0.72-0.51)<br>-2.95 ± 7.29     | 0.22 (-0.47-0.75)<br>-8.11** ± 3.76    | 0.01 (-0.62-0.63)<br>-8.65** ± 5.05    | -0.08 (-0.68-0.58)<br>-3.51 ± 6.14    | 0.96** (0.83-0.99)<br>7.89** ± 4.59   |
| Mediterranean (9)       | 0.03 (-0.65-0.68)<br>-6.80 ± 8.68      | 0.74* (0.14-0.94)<br>-3.11 ± 8.65     | 0.54 (-0.19-0.89)<br>-10.10 ± 9.10     | 0.06 (-0.63-0.7)<br>-8.94 ± 10.88      | -0.05 (-0.69-0.63)<br>-4.56 ± 18.09    | 0.62 (-0.08-0.91)<br>-3.11 ± 9.58     | 0.92** (0.66-0.98)<br>1.21 ± 7.62     |
| American (9)            | 0.46 (-0.29-0.86)<br>-3.53 ± 11.07     | 0.65 (-0.02-0.92)<br>-4.27 ± 16.67    | 0.41 (-0.35-0.85)<br>-2.81 ± 8.34      | 0.21 (-0.53-0.77)<br>-2.28 ± 7.41      | 0.05 (-0.64-0.69)<br>-4.41 ± 8.22      | 0.66 (-0.00-0.92)<br>8.39** ± 6.19    | 0.90* (0.58-0.98)<br>-4.59 ± 19.76    |
| Eastern Diet (33)       | 0.98** (0.96-0.99)<br>-4.75** ± 10.10  | 0.97** (0.95-0.99)<br>1.03 ± 13.78    | 0.98** (0.96-0.99)<br>-9.99 ± 8.57     | 0.98** (0.96-0.99)<br>-12.15 ± 6.88    | 0.98** (0.96-0.99)<br>-18.22 ± 8.30    | 0.98** (0.96-0.99)<br>-1.59 ± 7.67    | 0.99** (0.98-1.0)<br>5.41 ± 10.67     |
| Japanese (10)           | 0.89** (0.58-0.97)<br>-3.13** ± 2.20   | 0.96** (0.84-0.99)<br>1.92* ± 2.86    | 0.99** (0.97-1.0)<br>-4.57** ± 1.61    | 0.66* (0.06-0.91)<br>-8.34** ± 3.76    | 0.66* (0.05-0.91)<br>-15.11** ± 2.88   | 1.00** (0.98-1.0)<br>1.89** ± 1.38    | 1.00** (0.99-1.0)<br>7.58** ± 4.40    |
| Chinese (10)            | 0.82* (0.40-0.96)<br>-6.85** ± 2.31    | 0.95** (0.79-0.99)<br>1.83* ± 2.87    | 0.93** (0.74-0.98)<br>-10.74** ± 1.57  | 0.78* (0.30-0.95)<br>-16.71** ± 2.09   | 0.70* (0.13-0.92)<br>-20.09** ± 1.88   | 0.66* (0.05-0.91)<br>-2.46 ± 10.33    | 0.95** (0.80-0.99)<br>7.74** ± 3.88   |
| Korean (13)             | 0.98** (0.93-0.99)<br>-4.38 ± 16.07    | 0.97** (0.91-0.99)<br>-0.26 ± 22.16   | 0.98** (0.95-1.0)<br>-13.57** ± 12.38  | 0.99** (0.96-1.0)<br>-11.57** ± 9.09   | 0.98** (0.94-0.99)<br>-19.16** ± 12.77 | 0.99** (0.97-1.0)<br>-3.58* ± 7.76    | 0.99** (0.97-1.0)<br>1.96 ± 16.02     |
| Smoothie (22)           | 0.62* (0.27-0.83)<br>-9.13 ± 23.79     | 0.46* (0.05-0.74)<br>-7.70 ± 27.16    | 0.65* (0.32-0.84)<br>-9.86* ± 21.40    | 0.77** (0.52-0.9)<br>-14.12** ± 23.53  | 0.79** (0.56-0.91)<br>-12.90** ± 21.37 | 0.77** (0.52-0.9)<br>-7.80 ± 22.04    | 0.11 (-0.33-0.51)<br>-6.89 ± 33.37    |

Note: Carb: carbohydrate; Sat Fat: saturated fat; *r*: pairwise for intraclass correlation coefficient; CI: confidence interval; %diff: % difference against Nutrition Data System for Research; M: mean; SD: standard deviation; *r*: correlation; \**p* < 0.05; \*\**p* < 0.001.

**Supplementary Table S2.** Bias and agreement between internet-based application and Nutrition Data System for Research per domains of caloric ranges, energy nutrients, and various diets for vitamins Bs (N=131).

| Parameters (n)          | Thiamin, mg<br><i>r</i> ** (95%CI)<br>%diff M ± SD | Riboflavin, mg<br><i>r</i> ** (95%CI)<br>%diff M ± SD | Niacin, mg<br><i>r</i> ** (95%CI)<br>%diff M ± SD | Pyridoxine, mg<br><i>r</i> ** (95%CI)<br>%diff M ± SD | Folate, mcg<br><i>r</i> ** (95%CI)<br>%diff M ± SD | Cobalamin, mcg<br><i>r</i> ** (95%CI)<br>%diff M ± SD |
|-------------------------|----------------------------------------------------|-------------------------------------------------------|---------------------------------------------------|-------------------------------------------------------|----------------------------------------------------|-------------------------------------------------------|
| <b>Calories</b>         |                                                    |                                                       |                                                   |                                                       |                                                    |                                                       |
| <1000 (63)              | 0.83**(0.74-0.9)<br>6.68** ± 11.25                 | 0.71**(0.56-0.81)<br>-0.14 ± 11.51                    | 0.84**(0.74-0.9)<br>2.08 ± 13.03                  | 0.94**(0.9-0.96)<br>-2.75** ± 11.43                   | 0.78**(0.66-0.86)<br>12.79** ± 18.86               | 0.72**(0.58-0.82)<br>-13.43** ± 18.61                 |
| 1000-2000 (50)          | 0.90**(0.83-0.94)<br>10.16** ± 9.41                | 0.87**(0.78-0.92)<br>3.47** ± 10.18                   | 0.88**(0.80-0.93)<br>1.23 ± 8.57                  | 0.98**(0.97-0.99)<br>-2.91** ± 8.23                   | 0.95**(0.91-0.97)<br>9.54** ± 10.94                | 0.53**(0.3-0.7)<br>-12.27** ± 15.28                   |
| >2000 (18)              | 0.59*(0.21-0.82)<br>-4.44 ± 24.81                  | 0.61*(0.23-0.83)<br>-7.77 ± 23.64                     | 0.68**(0.35-0.87)<br>-7.00 ± 25.08                | 0.54*(0.13-0.79)<br>-14.18 ± 31.15                    | 0.55*(0.14-0.8)<br>-5.35 ± 27.79                   | 0.44(-0.0-0.74)<br>-17.83* ± 26.04                    |
| <b>Energy Nutrients</b> |                                                    |                                                       |                                                   |                                                       |                                                    |                                                       |
| Fat                     | 0.65**(0.48-0.77)<br>2.27 ± 16.95                  | 0.66**(0.5-0.78)<br>-3.02 ± 16.57                     | 0.71**(0.56-0.81)<br>-4.60* ± 14.94               | 0.62**(0.45-0.75)<br>-8.76** ± 18.74                  | 0.69**(0.54-0.8)<br>4.18 ± 19.94                   | 0.60**(0.41-0.73)<br>-18.66** ± 19.32                 |
| Protein                 | 0.77**(0.65-0.85)<br>3.05 ± 16.66                  | 0.80**(0.69-0.87)<br>-6.17* ± 14.70                   | 0.81**(0.71-0.88)<br>-4.64* ± 14.87               | 0.74**(0.61-0.84)<br>-10.24** ± 17.48                 | 0.77**(0.66-0.86)<br>2.10 ± 17.62                  | 0.77**(0.65-0.86)<br>-22.90** ± 17.58                 |
| Carbohydrate            | 0.74**(0.6-0.83)<br>1.01 ± 15.70                   | 0.78**(0.7-0.86)<br>-5.14* ± 13.32                    | 0.80**(0.69-0.87)<br>-4.87* ± 13.62               | 0.75**(0.62-0.84)<br>-10.05** ± 17.39                 | 0.76**(0.64-0.85)<br>1.97 ± 17.00                  | 0.73**(0.6-0.83)<br>-16.33** ± 18.73                  |
| <b>Diet Types</b>       |                                                    |                                                       |                                                   |                                                       |                                                    |                                                       |
| Pure Liquid (8)         | 0.95**(0.76-0.99)<br>6.94 ± 12.73                  | 0.47(-0.35-0.88)<br>-11.68 ± 16.58                    | 0.98**(0.91-1.0)<br>14.12 ± 23.59                 | 1.00**(0.99-1.0)<br>5.91 ± 18.77                      | 0.96**(0.77-0.99)<br>20.05** ± 38.13               | 0.38(-0.44-0.86)<br>-22.04** ± 23.39                  |
| Convenient Diet (30)    | 0.93**(0.86-0.97)<br>8.67** ± 11.98                | 0.92**(0.83-0.96)<br>7.67** ± 10.65                   | 0.92**(0.84-0.96)<br>2.06 ± 9.88                  | 0.80**(0.62-0.9)<br>-1.11 ± 10.32                     | 0.80**(0.62-0.9)<br>0.47** ± 15.55                 | 0.79**(0.59-0.89)<br>-8.11** ± 12.91                  |
| Canned Food (10)        | 0.94**(0.76-0.99)<br>4.35 ± 8.21                   | 0.80*(0.33-0.95)<br>7.54** ± 4.12                     | 0.93**(0.72-0.98)<br>0.88 ± 1.71                  | 0.96**(0.82-0.99)<br>2.93* ± 4.32                     | 0.97**(0.89-0.99)<br>30.51** ± 15.86               | 0.21(-0.48-0.74)<br>-8.96** ± 1.84                    |
| High School (10)        | 0.95**(0.81-0.99)<br>16.87** ± 5.15                | 0.93**(0.73-0.98)<br>10.83** ± 7.23                   | 0.88**(0.55-0.97)<br>4.19 ± 7.01                  | 0.91**(0.64-0.98)<br>-2.73 ± 4.54                     | 0.93**(0.72-0.98)<br>19.10** ± 6.64                | 0.70*(0.12-0.92)<br>-12.51* ± 15.18                   |
| Fast Food (10)          | 0.26(-0.44-0.76)<br>4.78 ± 16.0                    | -0.03(-0.65-0.61)<br>4.63 ± 16.58                     | -0.32(-0.79-0.39)<br>1.05 ± 15.97                 | -0.30(-0.78-0.41)<br>-3.54 ± 16.62                    | 0.43(-0.27-0.83)<br>11.81** ± 16.93                | 0.01(-0.62-0.63)<br>-2.87 ± 15.82                     |
| Ethnic Food (71)        | 0.97**(0.95-0.98)<br>8.68** ± 10.01                | 0.97**(0.95-0.98)<br>0.85 ± 8.66                      | 0.95**(0.91-0.97)<br>-0.01 ± 9.09                 | 0.98**(0.97-0.99)<br>-5.06** ± 8.13                   | 0.97**(0.96-0.98)<br>7.10** ± 9.35                 | 0.76**(0.64-0.85)<br>-13.62** ± 16.05                 |
| Western Diet (38)       | 0.96**(0.92-0.98)<br>11.36** ± 7.06                | 0.87**(0.76-0.93)<br>2.28 ± 9.92                      | 0.84**(0.72-0.92)<br>2.26 ± 7.59                  | 0.92**(0.84-0.96)<br>-5.21** ± 6.72                   | 0.91**(0.83-0.95)<br>7.78** ± 9.60                 | 0.77**(0.60-0.88)<br>-12.82** ± 14.22                 |
| Mexican (10)            | 0.96**(0.84-0.99)<br>15.27** ± 5.64                | 0.80*(0.35-0.95)<br>4.38 ± 7.37                       | 0.96**(0.82-0.99)<br>1.45 ± 2.95                  | 0.56(-0.11-0.88)<br>-3.22 ± 5.15                      | 0.77*(0.28-0.94)<br>11.94** ± 9.62                 | -0.19(-0.73-0.5)<br>-14.35** ± 4.66                   |
| Italian (10)            | 0.96**(0.84-0.99)<br>7.56** ± 1.59                 | 0.51(-0.17-0.86)<br>1.65 ± 4.83                       | -0.24(-0.76-0.46)<br>6.51* ± 12.01                | 0.84*(0.45-0.96)<br>-3.17 ± 4.76                      | 0.93**(0.74-0.98)<br>5.02** ± 2.75                 | 0.03(-0.61-0.65)<br>-9.77* ± 10.05                    |
| Mediterranean (9)       | 0.81**(0.32-0.96)<br>12.97** ± 7.19                | -0.22(-0.77-0.52)<br>1.83 ± 14.80                     | 0.95**(0.78-0.99)<br>-1.70 ± 2.66                 | 0.82*(0.35-0.96)<br>-7.82* ± 7.28                     | 0.94**(0.74-0.99)<br>8.68** ± 6.48                 | 0.03(-0.65-0.68)<br>-27.93** ± 16.92                  |
| American (9)            | 0.60(-0.11-0.9)<br>9.60* ± 9.83                    | 0.50(-0.24-0.88)<br>1.08 ± 11.87                      | 0.65(-0.02-0.92)<br>2.40 ± 6.82                   | 0.93**(0.68-0.98)<br>-7.08* ± 8.89                    | 0.70*(0.07-0.93)<br>5.32 ± 15.27                   | 0.57(-0.15-0.89)<br>0.58 ± 6.08                       |
| Eastern Diet (33)       | 0.98**(0.95-0.99)<br>5.60** ± 11.97                | 0.99**(0.99-1.0)<br>-0.80 ± 6.71                      | 0.98**(0.96-0.99)<br>-2.62 ± 10.05                | 0.99**(0.97-0.99)<br>-4.88** ± 9.61                   | 0.99**(0.97-0.99)<br>6.31** ± 9.14                 | 0.78**(0.59-0.89)<br>-14.55** ± 18.11                 |
| Japanese (10)           | 0.96**(0.84-0.99)<br>-0.28 ± 2.17                  | 0.97**(0.87-0.99)<br>0.97 ± 1.59                      | 1.00**(0.98-1.0)<br>0.97** ± 0.87                 | 1.00**(0.99-1.0)<br>-1.76 ± 2.47                      | 0.99**(0.96-1.0)<br>9.44** ± 2.95                  | 1.0**(0.99-1.0)<br>8.90** ± 3.65                      |
| Chinese (10)            | 0.96**(0.82-0.99)<br>13.70** ± 1.81                | 0.87*(0.54-0.97)<br>-0.38 ± 2.39                      | 0.88**(0.56-0.97)<br>-5.82** ± 1.92               | 0.97**(0.87-0.99)<br>-7.11** ± 2.21                   | 0.99**(0.97-1.0)<br>3.65** ± 0.83                  | 0.97**(0.89-0.99)<br>-20.62** ± 4.73                  |
| Korean (13)             | 0.98**(0.94-0.99)<br>3.89 ± 17.01                  | 0.99**(0.98-1.0)<br>-2.49 ± 10.40                     | 0.98**(0.93-0.99)<br>-2.91 ± 15.71                | 0.99**(0.96-1.0)<br>-5.57 ± 15.0                      | 0.99**(0.96-1.0)<br>5.94* ± 14.20                  | 0.95**(0.85-0.99)<br>-27.91** ± 12.88                 |
| Smoothie (22)           | 0.55*(0.17-0.79)<br>-3.77 ± 22.21                  | 0.57*(0.20-0.8)<br>-7.81 ± 21.57                      | 0.66**(0.34-0.85)<br>-4.86 ± 23.20                | 0.36(-0.07-0.68)<br>-10.38 ± 29.07                    | 0.28(-0.16-0.63)<br>-4.18 ± 25.22                  | 0.58*(0.20-0.8)<br>-17.89** ± 27.84                   |

Note: *r*: pairwise for intraclass correlation coefficient; CI: confidence interval; %diff: % difference against Nutrition Data System for Research; M: mean; SD: standard deviation; *r*: correlation; \**p* < 0.05; \*\**p* < 0.001.

**Supplementary Table S3.** Bias and agreement between internet-based application and Nutrition Data System for Research per domains of caloric ranges, energy nutrients, and various diets for methyl donors and vitamins A, C, and D (N=131).

| Parameters (n)          | Methionine <sup>^</sup> , g<br><i>r</i> ** (95%CI)<br>%diff M ± SD | Choline, mg<br><i>r</i> ** (95%CI)<br>%diff M ± SD | Glycine, g<br><i>r</i> ** (95%CI)<br>%diff M ± SD | Vitamin A, IU<br><i>r</i> ** (95%CI)<br>%diff M ± SD | Vitamin C, mcg<br><i>r</i> ** (95%CI)<br>%diff M ± SD | Vitamin D, mcg<br><i>r</i> ** (95%CI)<br>%diff M ± SD |
|-------------------------|--------------------------------------------------------------------|----------------------------------------------------|---------------------------------------------------|------------------------------------------------------|-------------------------------------------------------|-------------------------------------------------------|
| <b>Calories</b>         |                                                                    |                                                    |                                                   |                                                      |                                                       |                                                       |
| <1000 (63)              | 0.83**(0.74-0.9)<br>-9.97** ± 11.85                                | 0.88**(0.82-0.93)<br>-5.30** ± 9.93                | 0.76**(0.64-0.85)<br>-11.43** ± 14.41             | 0.95**(0.92-0.97)<br>34.51** ± 18.60                 | 0.85**(0.77-0.91)<br>4.70* ± 25.54                    | 0.91**(0.86-0.95)<br>-0.81 ± 12.28                    |
| 1000-2000(50)           | 0.90**(0.82-0.94)<br>-5.84** ± 9.63                                | 0.94**(0.90-0.97)<br>-2.95** ± 8.34                | 0.88**(0.80-0.93)<br>-7.83** ± 9.84               | 0.99**(0.98-0.99)<br>33.32** ± 19.88                 | 0.99**(0.98-0.99)<br>5.13** ± 13.98                   | 0.61**(0.41-0.76)<br>2.68** ± 16.35                   |
| >2000 (18)              | 0.67*(0.33-0.86)<br>-12.66** ± 22.51                               | 0.50*(0.07-0.77)<br>-6.10 ± 45.37                  | 0.65*(0.29-0.85)<br>-14.43** ± 24.44              | 0.50*(0.08-0.77)<br>-9.60 ± 57.99                    | 0.61*(0.23-0.83)<br>-13.12 ± 38.08                    | 0.86**(0.68-0.95)<br>0.59 ± 16.50                     |
| <b>Energy Nutrients</b> |                                                                    |                                                    |                                                   |                                                      |                                                       |                                                       |
| Fat                     | 0.72**(0.58-0.82)<br>-12.49** ± 14.80                              | 0.48**(0.27-0.65)<br>-7.23* ± 24.94                | 0.71**(0.57-0.81)<br>-15.35** ± 15.48             | 0.69**(0.54-0.8)<br>22.84** ± 38.59                  | 0.69**(0.54-0.8)<br>-0.11 ± 31.11                     | 0.84**(0.75-0.9)<br>-1.70 ± 16.26                     |
| Protein                 | 0.85**(0.76-0.9)<br>-16.67** ± 11.63                               | 0.77**(0.66-0.86)<br>-12.07** ± 13.77              | 0.84**(0.75-0.9)<br>-19.87** ± 12.36              | 0.73**(0.59-0.82)<br>18.49** ± 37.16                 | 0.74**(0.61-0.84)<br>-4.82 ± 28.92                    | 0.86**(0.78-0.91)<br>-2.28 ± 15.82                    |
| Carbohydrate            | 0.80**(0.69-0.87)<br>-11.83** ± 12.21                              | 0.74**(0.61-0.83)<br>-9.94** ± 13.97               | 0.79**(0.68-0.87)<br>-14.68** ± 13.84             | 0.76**(0.64-0.85)<br>21.10** ± 38.60                 | 0.81**(0.71-0.88)<br>-1.84 ± 29.26                    | 0.80**(0.69-0.87)<br>-0.62 ± 14.36                    |
| <b>Diet Types</b>       |                                                                    |                                                    |                                                   |                                                      |                                                       |                                                       |
| Pure Liquid (8)         | 0.64(-0.12-0.93)<br>-18.58* ± 18.21                                | 0.91*(0.56-0.98)<br>-7.0 ± 15.99                   | 0.77*(0.13-0.96)<br>-16.0 ± 23.29                 | 0.98**(0.89-1.0)<br>35.27** ± 30.34                  | 0.99**(0.95-1.0)<br>-11.32 ± 26.18                    | 0.29(-0.52-0.83)<br>-15.48* ± 22.57                   |
| Convenient Diet (30)    | 0.94**(0.88-0.97)<br>-1.54** ± 10.27                               | 0.92**(0.84-0.96)<br>0.66 ± 10.35                  | 0.92**(0.83-0.96)<br>-2.51* ± 10.75               | 0.75**(0.54-0.88)<br>46.93** ± 16.17                 | 0.90**(0.81-0.95)<br>15.17** ± 18.46                  | 0.83**(0.67-0.92)<br>4.51 ± 13.94                     |
| Canned Food (10)        | 0.99**(0.98-1.0)<br>-2.08** ± 1.0                                  | 0.98**(0.90-0.99)<br>5.06** ± 6.19                 | 0.99**(0.98-1.0)<br>0.87 ± 4.62                   | 0.92**(0.71-0.98)<br>34.18** ± 14.47                 | -0.31(-0.78-0.4)<br>22.51* ± 18.05                    | 0.65*(0.03-0.91)<br>-6.82** ± 2.33                    |
| High School (10)        | 0.86*(0.50-0.97)<br>-2.35 ± 9.10                                   | 0.87*(0.54-0.97)<br>-1.86 ± 5.55                   | 0.80*(0.33-0.95)<br>-4.41 ± 10.58                 | 0.13(-0.55-0.7)<br>53.82** ± 13.05                   | 0.94**(0.75-0.99)<br>-0.44 ± 5.38                     | 0.56(-0.10-0.88)<br>12.98** ± 9.18                    |
| Fast Food (10)          | 0.12(-0.55-0.7)<br>-0.20 ± 15.90                                   | 0.37(-0.34-0.81)<br>-1.22 ± 15.60                  | 0.05(-0.60-0.66)<br>-4.0 ± 14.83                  | 0.16(-0.52-0.72)<br>52.78** ± 13.83                  | 0.99**(0.95-1.0)<br>23.43** ± 18.36                   | 0.24(-0.46-0.76)<br>7.38 ± 17.45                      |
| Ethnic Food (71)        | 0.94**(0.91-0.96)<br>-10.17** ± 8.83                               | 0.97**(0.95-0.98)<br>-6.3 ** ± 7.05                | 0.92**(0.87-0.95)<br>-12.80** ± 10.54             | 0.99**(0.98-0.99)<br>31.40 ± 16.48                   | 0.92**(0.87-0.95)<br>1.85** ± 20.45                   | 0.97**(0.95-0.98)<br>2.62** ± 8.34                    |
| Western Diet (38)       | 0.82**(0.67-0.9)<br>-8.21 ± 8.60                                   | 0.86**(0.75-0.93)<br>-4.88 ± 7.15                  | 0.79**(0.62-0.88)<br>-10.11 ± 9.71                | 0.94**(0.89-0.97)<br>38.82** ± 13.55                 | 0.89**(0.80-0.94)<br>-3.51 ± 17.93                    | 0.91**(0.83-0.95)<br>3.06 ± 9.74                      |
| Mexican (10)            | 0.94**(0.77-0.99)<br>-10.65** ± 1.99                               | 0.69*(0.10-0.92)<br>-3.36 ± 5.45                   | 0.90**(0.61-0.98)<br>-9.79** ± 2.91               | 0.94**(0.77-0.99)<br>36.40** ± 6.97                  | 0.87**(0.53-0.97)<br>-6.04 ± 9.31                     | 0.18(-0.51-0.73)<br>3.30 ± 10.72                      |
| Italian (10)            | -0.23(-0.75-0.47)<br>-5.36 ± 8.07                                  | -0.06(-0.66-0.59)<br>-5.56* ± 6.54                 | -0.34(-0.80-0.37)<br>-5.51 ± 9.85                 | 0.99**(0.97-1.0)<br>38.05** ± 9.74                   | 0.99**(0.97-1.0)<br>1.30 ± 3.89                       | 0.29(-0.41-0.78)<br>-2.64 ± 10.43                     |
| Mediterranean (9)       | 0.63(-0.05-0.91)<br>-13.16* ± 11.20                                | 0.17(-0.55-0.75)<br>-7.70 ± 8.66                   | 0.85*(0.43-0.97)<br>-21.13** ± 6.59               | 0.99**(0.97-1.0)<br>41.53** ± 16.18                  | 1.00**(0.99-1.0)<br>-10.94** ± 5.80                   | 0.66(-0.01-0.92)<br>9.41** ± 1.93                     |
| American (9)            | 0.51(-0.23-0.88)<br>-3.71 ± 8.42                                   | 0.61(-0.09-0.91)<br>-2.98 ± 7.95                   | 0.58(-0.14-0.9)<br>-4.55 ± 8.70                   | 0.86*(0.46-0.97)<br>39.64** ± 20.21                  | 0.75*(0.18-0.94)<br>1.38 ± 34.82                      | 0.44(-0.32-0.85)<br>2.75 ± 9.88                       |
| Eastern Diet (33)       | 0.97**(0.95-0.99)<br>-12.43** ± 8.67                               | 0.99**(0.97-0.99)<br>-7.95** ± 6.67                | 0.96**(0.91-0.98)<br>-15.89** ± 10.75             | 0.99**(0.98-1.0)<br>22.86** ± 15.55                  | 0.92**(0.85-0.96)<br>8.03** ± 21.68                   | 0.99**(0.99-1.0)<br>2.12** ± 6.46                     |
| Japanese (10)           | 0.99**(0.98-1.0)<br>-7.16** ± 1.94                                 | 0.99**(0.97-1.0)<br>-6.70** ± 1.36                 | 0.99**(0.98-1.0)<br>-6.48** ± 1.65                | 1.00**(0.98-1.0)<br>40.95** ± 12.02                  | 1.00**(1.0-1.0)<br>12.37** ± 8.91                     | 1.00**(0.99-1.0)<br>1.27** ± 2.27                     |
| Chinese (10)            | 0.97**(0.87-0.99)<br>-13.76** ± 1.52                               | 0.55(-0.12-0.88)<br>-5.88 ± 5.37                   | 0.95**(0.80-0.99)<br>-19.15** ± 1.58              | 1.00**(1.0-1.0)<br>18.22** ± 5.25                    | 1.00**(0.99-1.0)<br>1.44 ± 3.41                       | 0.99**(0.96-1.0)<br>3.83** ± 3.58                     |
| Korean (13)             | 0.98**(0.93-0.99)<br>-15.46** ± 12.71                              | 0.99**(0.97-1.0)<br>-10.50** ± 9.15                | 0.97**(0.90-0.99)<br>-20.63** ± 14.05             | 0.99**(0.98-1.0)<br>12.52** ± 10.44                  | 0.89**(0.67-0.97)<br>9.77 ± 33.62                     | 0.99**(0.97-1.0)<br>1.46 ± 9.71                       |
| Smoothie (22)           | 0.70**(0.40-0.87)<br>-10.49** ± 21.01                              | 0.41(-0.01-0.71)<br>-4.88 ± 40.98                  | 0.66**(0.33-0.85)<br>-11.79** ± 22.86             | 0.23(-0.21-0.59)<br>-11.46 ± 47.91                   | 0.54*(0.16-0.79)<br>-8.18 ± 35.77                     | 0.83**(0.62-0.93)<br>-4.73 ± 21.74                    |

Note: <sup>^</sup>Methionine RDI derived from a standard weight of 65 kg; *r*: pairwise for intraclass correlation coefficient; CI: confidence interval; %diff: % difference against Nutrition Data System for Research; M: mean; SD: standard deviation; *r*: correlation; \**p* <0.05; \*\**p* <0.001.

**Supplementary Table S4.** Bias and agreement between internet-based application and Nutrition Data System for Research per domains of caloric ranges, energy nutrients, and various diets for vitamin E and minerals (N=131).

| Parameters (n)          | Vitamin E, mcg                         | Zinc, mg                               | Calcium, mg                           | Magnesium, mg                         | Iron, mg                              | Sodium, mg                             |
|-------------------------|----------------------------------------|----------------------------------------|---------------------------------------|---------------------------------------|---------------------------------------|----------------------------------------|
|                         | <i>r</i> ** (95%CI)                    | <i>r</i> ** (95%CI)                    | <i>r</i> ** (95%CI)                   | <i>r</i> ** (95%CI)                   | <i>r</i> ** (95%CI)                   | <i>r</i> ** (95%CI)                    |
|                         | %diff M ± SD                           | %diff M ± SD                           | %diff M ± SD                          | %diff M ± SD                          | %diff M ± SD                          | %diff M ± SD                           |
| <b>Caloric Ranges</b>   |                                        |                                        |                                       |                                       |                                       |                                        |
| <1000 (63)              | 0.81** (0.70-0.88)<br>7.55** ± 22.56   | 0.50** (0.29-0.66)<br>-12.21** ± 16.74 | -0.11 (-0.34-0.14)<br>10.35 ± 41.41   | 0.83** (0.73-0.89)<br>2.22** ± 13.05  | 0.72** (0.58-0.82)<br>6.54** ± 21.09  | 0.83** (0.74-0.89)<br>-18.09** ± 16.56 |
| 1000-2000 (50)          | 0.63** (0.43-0.77)<br>-5.53 ± 22.04    | 0.57** (0.35-0.73)<br>-11.98** ± 10.61 | 0.81** (0.69-0.89)<br>-6.32** ± 11.60 | 0.98** (0.96-0.99)<br>4.02** ± 9.26   | 0.87** (0.78-0.92)<br>3.42** ± 9.53   | 0.50** (0.26-0.68)<br>-15.84** ± 17.39 |
| >2000 (18)              | 0.53* (0.12-0.79)<br>-11.82 ± 28.51    | 0.64* (0.28-0.84)<br>-14.89* ± 23.66   | 0.53* (0.12-0.79)<br>-8.04 ± 23.10    | 0.55* (0.14-0.80)<br>-8.78 ± 29.71    | 0.66* (0.31-0.85)<br>-9.77 ± 22.78    | 0.59* (0.19-0.82)<br>-36.59** ± 22.07  |
| <b>Energy Nutrients</b> |                                        |                                        |                                       |                                       |                                       |                                        |
| Fat                     | 0.64** (0.47-0.76)<br>-11.78** ± 25.18 | 0.60** (0.42-0.74)<br>-17.36** ± 17.82 | 0.26* (0.02-0.47)<br>-4.31 ± 29.77    | 0.60** (0.42-0.74)<br>-2.20 ± 19.80   | 0.68** (0.53-0.79)<br>-1.09 ± 18.61   | 0.51** (0.30-0.67)<br>-22.24** ± 17.12 |
| Proteins                | 0.73** (0.60-0.83)<br>-0.53 ± 21.28    | 0.81** (0.71-0.88)<br>-21.96** ± 13.68 | 0.25* (0.01-0.47)<br>1.06 ± 41.65     | 0.74** (0.61-0.83)<br>-5.60* ± 17.18  | 0.82** (0.73-0.89)<br>-5.09* ± 15.91  | 0.72** (0.58-0.82)<br>-24.65** ± 16.64 |
| Carbohydrate            | 0.68** (0.52-0.79)<br>-5.29 ± 25.05    | 0.75** (0.62-0.84)<br>-17.42** ± 14.91 | 0.28* (0.04-0.48)<br>-1.53 ± 34.90    | 0.75** (0.62-0.84)<br>-4.62* ± 17.33  | 0.81** (0.70-0.88)<br>-4.47* ± 15.87  | 0.69** (0.54-0.8)<br>-25.93** ± 17.06  |
| <b>Diet Type</b>        |                                        |                                        |                                       |                                       |                                       |                                        |
| Pure Liquid (8)         | 0.99** (0.93-1.0)<br>21.70 ± 44.47     | 0.49 (-0.33-0.89)<br>-12.66 ± 23.51    | -0.32 (-0.84-0.49)<br>-12.76 ± 21.24  | 0.96** (0.77-0.99)<br>3.21 ± 19.25    | 0.77* (0.14-0.96)<br>18.50 ± 46.19    | 0.84* (0.32-0.97)<br>-13.88 ± 43.08    |
| Convenient Diet (30)    | 0.40* (0.05-0.67)<br>19.65** ± 24.43   | 0.83** (0.68-0.92)<br>-3.99* ± 13.02   | 0.93** (0.87-0.97)<br>-1.47 ± 11.27   | 0.84** (0.69-0.92)<br>10.45** ± 11.41 | 0.86** (0.72-0.93)<br>14.04** ± 12.83 | 0.93** (0.86-0.97)<br>-8.88** ± 13.38  |
| Canned Food (10)        | 0.51 (-0.17-0.86)<br>20.0 ± 21.14      | 0.99** (0.96-1.0)<br>8.50** ± 3.19     | 0.90** (0.61-0.98)<br>0.31 ± 3.09     | 0.99** (0.96-1.0)<br>15.67** ± 5.52   | 0.99** (0.97-1.0)<br>25.71** ± 2.20   | 0.98** (0.9-1.0)<br>-20.02** ± 6.81    |
| High School (10)        | 0.92** (0.68-0.98)<br>2.18 ± 5.56      | 0.90** (0.63-0.98)<br>-10.13** ± 7.42  | 0.94** (0.77-0.99)<br>3.19 ± 7.30     | 0.91** (0.66-0.98)<br>10.22** ± 5.68  | 0.92** (0.70-0.98)<br>9.90** ± 5.45   | 0.89** (0.61-0.98)<br>1.42 ± 7.57      |
| Fast Food (10)          | 0.27 (-0.43-0.77)<br>41.13** ± 20.09   | -0.25 (-0.76-0.45)<br>-10.33 ± 14.86   | 0.20 (-0.49-0.74)<br>-7.90 ± 16.52    | 0.06 (0.59-0.67)<br>5.45 ± 17.29      | -0.16 (-0.72-0.52)<br>6.52 ± 16.21    | 0.25 (-0.45-0.76)<br>-8.05 ± 14.71     |
| Ethnic Food (71)        | 0.93** (0.89-0.96)<br>-8.58** ± 10.84  | 0.91** (0.86-0.94)<br>-16.45** ± 11.44 | 0.22 (0.01-0.43)<br>7.99 ± 39.24      | 0.98** (0.97-0.99)<br>-0.33 ± 9.25    | 0.97** (0.94-0.98)<br>0.58 ± 9.95     | 0.91** (0.86-0.95)<br>-18.38** ± 10.23 |
| Western Diet (38)       | 0.64** (0.4-0.8)<br>7.91** ± 12.15     | 0.78** (0.61-0.88)<br>-16.28** ± 10.44 | 0.60** (0.34-0.77)<br>-5.63* ± 15.05  | 0.80** (0.64-0.89)<br>0.01 ± 9.12     | 0.96** (0.92-0.98)<br>1.80 ± 8.51     | 0.91** (0.84-0.95)<br>-12.18** ± 7.86  |
| Mexican (10)            | -0.25 (-0.76-0.45)<br>4.04 ± 18.06     | 0.76* (0.26-0.94)<br>-15.31** ± 5.61   | 0.74* (0.21-0.93)<br>-11.41** ± 10.40 | 0.89** (0.59-0.97)<br>2.23 ± 5.64     | 0.96** (0.82-0.99)<br>5.36** ± 3.82   | 0.88** (0.55-0.97)<br>-8.01** ± 5.55   |
| Italian (10)            | 0.99** (0.94-1.0)<br>11.91** ± 3.61    | -0.42 (-0.83-0.29)<br>-12.10** ± 11.32 | 0.44 (-0.26-0.84)<br>-7.64** ± 6.25   | 0.74* (0.20-0.93)<br>0.46 ± 4.09      | 0.40 (-0.31-0.82)<br>6.76** ± 4.97    | 0.62 (-0.01-0.9)<br>-16.40** ± 3.35    |
| Mediterranean (9)       | 0.95** (0.78-0.99)<br>0.74 ± 6.09      | -0.25 (-0.79-0.49)<br>-23.17** ± 13.26 | -0.25 (-0.78-0.5)<br>1.89 ± 21.36     | 0.61 (-0.09-0.91)<br>2.12 ± 8.16      | 0.75* (0.18-0.94)<br>-8.90** ± 5.36   | -0.26 (-0.79-0.49)<br>-12.23* ± 10.70  |
| American (9)            | 0.81* (0.30-0.96)<br>14.93** ± 10.60   | 0.22 (-0.52-0.77)<br>-15.11** ± 8.41   | 0.12 (-0.59-0.73)<br>-4.51 ± 17.70    | 0.59 (-0.13-0.9)<br>-5.07 ± 14.93     | 0.47 (-0.28-0.86)<br>3.03 ± 9.22      | 0.17 (-0.55-0.75)<br>-12.06** ± 8.94   |
| Eastern Diet (33)       | 0.98** (0.96-0.99)<br>9.36** ± 9.22    | 0.95** (0.89-0.97)<br>-16.65** ± 12.67 | 0.34 (0.01-0.61)<br>23.67 ± 51.30     | 0.99** (0.98-1.0)<br>-0.72 ± 9.53     | 0.98** (0.95-0.99)<br>-0.82 ± 11.36   | 0.97** (0.95-0.99)<br>-25.53** ± 7.68  |
| Japanese (10)           | 0.93** (0.72-0.98)<br>15.91** ± 6.21   | 0.98** (0.93-1.0)<br>-5.54** ± 1.16    | 0.99** (0.96-1.0)<br>2.44 ± 0.79      | 1.0** (0.99-1.0)<br>3.76** ± 0.93     | 0.93** (0.71-0.98)<br>6.93** ± 4.03   | 0.65* (0.03-0.91)<br>-27.38** ± 3.71   |
| Chinese (10)            | 0.98** (0.9-0.99)<br>1.35 ± 3.21       | 0.66* (0.05-0.91)<br>-22.09** ± 1.80   | 0.97** (0.86-0.99)<br>-8.44** ± 1.51  | 0.86* (0.49-0.97)<br>-0.98 ± 3.19     | 0.93** (0.71-0.98)<br>-3.74** ± 1.71  | 0.79* (0.31-0.95)<br>-21.70** ± 3.30   |
| Korean (13)             | 0.99** (0.98-1.0)<br>10.49** ± 9.98    | 0.96** (0.87-0.99)<br>-21.01** ± 16.62 | 0.22 (-0.38-0.69)<br>64.70* ± 62.91   | 0.99** (0.97-1.0)<br>-3.98 ± 14.34    | 0.98** (0.94-0.99)<br>-4.54 ± 16.05   | 0.98** (0.94-1.0)<br>-27.05** ± 11.01  |
| Smoothie (22)           | 0.44* (0.02-0.73)<br>9.39 ± 26.64      | -0.62* (0.27-0.82)<br>-11.24 ± 23.16   | 0.57* (0.2-0.8)<br>-10.46 ± 20.70     | 0.24 (-0.21-0.6)<br>-6.03 ± 27.38     | 0.61* (0.25-0.82)<br>-9.25* ± 20.28   | 0.67** (0.35-0.85)<br>-41.27** ± 17.60 |

Note: *r*: pairwise for intraclass correlation coefficient; CI: confidence interval; %diff: % difference against Nutrition Data System for Research; M: mean; SD: standard deviation; *r*: correlation; \**p* < 0.05; \*\**p* < 0.001.

**Supplementary Table S5.** Progression on selecting significant factors contributing to the differences between Internet-based Application and Nutrition Data System for Research on total calories.

| Parameters                                               | Logistic Regression<br>original model |        |       |        | Generalized Regression<br>Elastic Net model validation |        |       |        |
|----------------------------------------------------------|---------------------------------------|--------|-------|--------|--------------------------------------------------------|--------|-------|--------|
|                                                          | p ( $\chi^2$ )                        | MR     | AICc  | AUC    | p ( $\chi^2$ )                                         | MR     | AICc  | AUC    |
| <b><u>Caloric Range, % Difference</u></b>                |                                       |        |       |        |                                                        |        |       |        |
| < 1000                                                   | 0.5467                                | 0.5556 | 44.75 | 0.6335 | 0.5657                                                 | 0.5556 | 44.75 | 0.6335 |
| > 2000                                                   | 0.1798                                |        |       |        | 0.1875                                                 |        |       |        |
| <b><u>Energy Nutrients, % Difference</u></b>             |                                       |        |       |        |                                                        |        |       |        |
| Fat                                                      | 0.0001                                | 0.2593 | 36.63 | 0.8636 | <0.0001                                                | 0.2593 | 35.83 | 0.8636 |
| Carbohydrate                                             | 0.0003                                |        |       |        | <0.0001                                                |        |       |        |
| Protein                                                  | 0.0454                                |        |       |        | 0.0489                                                 |        |       |        |
| <b><u>Diet Types</u></b>                                 |                                       |        |       |        |                                                        |        |       |        |
| Fast Food                                                | 0.9148                                | 0.4074 | 64.03 | 0.5142 | 0.0262                                                 | 0.4074 | 44.71 | 0.5142 |
| Chinese                                                  | 0.9148                                |        |       |        | <0.0001                                                |        |       |        |
| <b><u>Combined Factor Model: 3 Factors</u></b> (Table 3) |                                       |        |       |        |                                                        |        |       |        |
| < 1000 caloric range                                     | 0.0318                                | 0.1852 | 30.29 | 0.8920 | 0.0313                                                 | 0.1852 | 30.29 | 0.8920 |
| Protein % Difference                                     | 0.0118                                |        |       |        | 0.0109                                                 |        |       |        |
| Fat % Difference                                         | <0.0001                               |        |       |        | <0.0001                                                |        |       |        |
| <b><u>Combined Factor Model: 4 Factors</u></b>           |                                       |        |       |        |                                                        |        |       |        |
| < 1000 caloric range                                     | 0.0213                                | 0.1852 | 33.09 | 0.8977 | 0.0212                                                 | 0.1852 | 33.09 | 0.8977 |
| Protein % Difference                                     | 0.0360                                |        |       |        | 0.0332                                                 |        |       |        |
| Fat % Difference                                         | <0.0001                               |        |       |        | <0.0001                                                |        |       |        |
| Chinese                                                  | 0.9073                                |        |       |        | <0.0001                                                |        |       |        |

Note: MR: misclassification rate; AICc: Akaike's information criterion with corrections; AUC: Area under the curve

**Supplementary Table S6.** Progression on selecting significant factors contributing to the differences between Internet-based Application and Nutrition Data System for Research on folate.

| Parameters                                               | Logistic Regression original model |        |       |        | Generalized Regression Elastic Net model validation |        |       |        |
|----------------------------------------------------------|------------------------------------|--------|-------|--------|-----------------------------------------------------|--------|-------|--------|
|                                                          | p ( $\chi^2$ )                     | MR     | AICc  | AUC    | p ( $\chi^2$ )                                      | MR     | AICc  | AUC    |
| <b><u>Caloric Range, % Difference</u></b>                |                                    |        |       |        |                                                     |        |       |        |
| < 1000                                                   | 0.0038                             | 0.4074 | 44.53 | 0.6382 | 0.0454                                              | 0.4074 | 44.05 | 0.6382 |
| <b><u>Energy Nutrients, % Difference</u></b>             |                                    |        |       |        |                                                     |        |       |        |
| Carbohydrate                                             | 0.1436                             | 0.3333 | 42.66 | 0.7697 | 0.1428                                              | 0.3333 | 42.66 | 0.7697 |
| Protein                                                  | 0.0529                             |        |       |        | 0.0533                                              |        |       |        |
| Fiber                                                    | 0.2859                             |        |       |        | 0.2810                                              |        |       |        |
| <b><u>Diet Types</u></b>                                 |                                    |        |       |        |                                                     |        |       |        |
| Canned food                                              | 0.8927                             | 0.4815 | 45.67 | 0.8618 | <0.0001                                             | 0.4815 | 45.67 | 0.8618 |
| High School                                              | 0.8927                             |        |       |        | <0.0001                                             |        |       |        |
| Italian                                                  | 0.8926                             |        |       |        | <0.0001                                             |        |       |        |
| Chinese                                                  | 0.8783                             |        |       |        | <0.0001                                             |        |       |        |
| Smoothie                                                 | 0.0342                             |        |       |        | 0.0342                                              |        |       |        |
| <b><u>Combined Factor Model: 3 Factors</u></b> (Table 4) |                                    |        |       |        |                                                     |        |       |        |
| Calories range < 1000                                    | 0.0033                             | 0.2963 | 38.52 | 0.9046 | 0.0033                                              | 0.2963 | 38.52 | 0.9046 |
| Carbohydrate % Difference                                | 0.0001                             |        |       |        | 0.0001                                              |        |       |        |
| Italian diet                                             | 0.8842                             |        |       |        | <0.0001                                             |        |       |        |
| <b><u>Combined Factor Model: 4 Factors</u></b>           |                                    |        |       |        |                                                     |        |       |        |
| Calories range < 1000                                    | 0.0119                             | 0.2963 | 38.88 | 0.9112 | 0.0119                                              | 0.2963 | 38.88 | 0.9112 |
| Carbohydrate % Difference                                | 0.0004                             |        |       |        | 0.0003                                              |        |       |        |
| Italian diet                                             | 0.9085                             |        |       |        | <0.0001                                             |        |       |        |
| Chinese diet                                             | 0.9039                             |        |       |        | <0.0001                                             |        |       |        |

Note: MR: misclassification rate; AICc: Akaike's information criterion with corrections; AUC: Area under the curve

**Supplementary Table S7.** Progression on selecting significant factors contributing to the differences between Internet-based Application and Nutrition Data System for Research on cobalamin.

| Parameters                                               | Logistic Regression<br>original model |        |       |        | Generalized Regression<br>Elastic Net model validation |        |       |        |
|----------------------------------------------------------|---------------------------------------|--------|-------|--------|--------------------------------------------------------|--------|-------|--------|
|                                                          | p ( $\chi^2$ )                        | MR     | AICc  | AUC    | p ( $\chi^2$ )                                         | MR     | AICc  | AUC    |
| <b><u>Caloric Range, % Difference</u></b>                |                                       |        |       |        |                                                        |        |       |        |
| > 2000                                                   | 0.1480                                | 0.5185 | 42.21 | 0.5167 | 0.6025                                                 | 0.5185 | 41.84 | 0.5167 |
| <b><u>Energy Nutrients, % Difference</u></b>             |                                       |        |       |        |                                                        |        |       |        |
| Protein                                                  | <0.0001                               | 0.2593 | 36.33 | 0.7583 | <0.0001                                                | 0.2593 | 35.86 | 0.7583 |
| <b><u>Diet Types</u></b>                                 |                                       |        |       |        |                                                        |        |       |        |
| Mexican                                                  | 0.0269                                | 0.2963 | 45.45 | 0.8000 | 0.0269                                                 | 0.2963 | 45.45 | 0.8000 |
| Mediterranean                                            | 0.0269                                |        |       |        | 0.0269                                                 |        |       |        |
| American                                                 | 0.8968                                |        |       |        | <0.0001                                                |        |       |        |
| Japanese                                                 | 0.8830                                |        |       |        | <0.0001                                                |        |       |        |
| Chinese                                                  | 0.8716                                |        |       |        | <0.0001                                                |        |       |        |
| Korea                                                    | 0.0134                                |        |       |        | 0.0134                                                 |        |       |        |
| <b><u>Combined Factor Model: 3 Factors</u></b> (Table 5) |                                       |        |       |        |                                                        |        |       |        |
| Protein % Difference                                     | <0.0001                               | 0.2593 | 37.73 | 0.8083 | <0.0001                                                | 0.2593 | 37.42 | 0.8083 |
| American                                                 | 0.9124                                |        |       |        | 0.0002                                                 |        |       |        |
| Japanese                                                 | 0.8929                                |        |       |        | <0.0001                                                |        |       |        |
| <b><u>Combined Factor Model: 4 Factors</u></b>           |                                       |        |       |        |                                                        |        |       |        |
| Protein % Difference                                     | <0.0001                               | 0.2593 | 40.58 | 0.8111 | <0.0001                                                | 0.2593 | 40.42 | 0.8111 |
| American                                                 | 0.8910                                |        |       |        | <0.0001                                                |        |       |        |
| Japanese                                                 | 0.8671                                |        |       |        | <0.0001                                                |        |       |        |
| Chinese                                                  | 0.9105                                |        |       |        | <0.0001                                                |        |       |        |
| <b><u>Combined Factor Model: 5 Factors</u></b>           |                                       |        |       |        |                                                        |        |       |        |
| Protein % Difference                                     | <0.0001                               | 0.2222 | 42.87 | 0.8361 | <0.0001                                                | 0.222  | 42.56 | 0.8361 |
| Mexican                                                  | 0.0290                                |        |       |        | 0.0363                                                 |        |       |        |
| American diet                                            | 0.8915                                |        |       |        | 0.0002                                                 |        |       |        |
| Japanese diet                                            | 0.8680                                |        |       |        | <0.0001                                                |        |       |        |
| Chinese diet                                             | 0.9093                                |        |       |        | 0.0111                                                 |        |       |        |

Note: MR: misclassification rate; AICc: Akaike's information criterion with corrections; AUC: Area under the curve

**Supplementary Table S8.** Summary of significant factors contributing to the differences between Internet-based Application and Nutrition Data System for Research on major nutrients.

| Parameters                            | Carbohydrate | Protein      | Fat          | Saturated Fat | Cholesterol  | Fiber        |
|---------------------------------------|--------------|--------------|--------------|---------------|--------------|--------------|
|                                       | % Difference | % Difference | % Difference | % Difference  | % Difference | % Difference |
| <b>Caloric range</b>                  |              |              |              |               |              |              |
| 1000-2000                             | -            | 0.0086       | -            | -             | -            | 0.0219       |
| <b>Energy Nutrients, % Difference</b> |              |              |              |               |              |              |
| Total Calories                        | <0.0001      | <0.0001      | -            | 0.0027        | -            | -            |
| Carbohydrate                          | n/a          | -            | -            | -             | -            | <0.0001      |
| Protein                               | -            | n/a          | -            | -             | 0.0053       | -            |
| Fat                                   | -            | -            | n/a          | 0.0002        | 0.0018       | -            |
| Saturated fat                         | -            | -            | <0.0001      | n/a           | -            | -            |
| Cholesterol                           | -            | 0.0114       | 0.0020       | -             | n/a          | -            |
| Fiber                                 | <0.0001      | -            | -            | -             | -            | n/a          |
| <b>Diet Types</b>                     |              |              |              |               |              |              |
| Pure liquid                           | -            | -            | -            | -             | -            | -            |
| Canned-food                           | -            | <0.0001      | -            | -             | <0.0001      | <0.0001      |
| Fast foods                            | -            | -            | 0.0273       | -             | -            | -            |
| Italian                               | <0.0001      | -            | -            | -             | -            | -            |
| American                              | -            | -            | -            | -             | <0.0001      | -            |
| Japanese                              | -            | -            | -            | -             | <0.0001      | -            |
| Korean                                | -            | -            | -            | 0.0042        | -            | -            |
| MR                                    | 0.2222       | 0.1111       | 0.1111       | 0.1111        | 0.2222       | 0.1481       |
| AICc                                  | 32.6010      | 32.2818      | 27.34        | 23.9683       | 36.8539      | 30.5846      |
| AUC                                   | 0.8097       | 0.9000       | 0.9278       | 0.9753        | 0.9176       | 0.9056       |

Note: MR: misclassification rate; AICc: Akaike's information criterion with corrections; AUC: Area under the curve. Insignificant parameters are excluded: caloric ranges of <1000 and >2000, pure liquid diet, high school diet, Mexican diet, Mediterranean diet, Chinese diet, and smoothie-added diet.



**Supplementary Table S9.** Summary of significant factors contributing to the differences between Internet-based Application and Nutrition Data System for Research on methyl-donors and co-factors.

| Parameters                            | Thiamin<br>% Difference | Riboflavin<br>% Difference | Niacin<br>% Difference | Pyridoxine<br>% Difference | Choline<br>% Difference | Glycine<br>% Difference | Zinc<br>% Difference |
|---------------------------------------|-------------------------|----------------------------|------------------------|----------------------------|-------------------------|-------------------------|----------------------|
| <b>Energy Nutrients, % Difference</b> |                         |                            |                        |                            |                         |                         |                      |
| Total Calories                        | 0.0018                  | -                          | <0.0001                | <0.0001                    | <0.0001                 | -                       | 0.0148               |
| Carbohydrate                          | -                       | <0.0001                    | -                      | -                          | -                       | -                       | -                    |
| Protein                               | -                       | 0.0015                     | -                      | -                          | -                       | <0.0001                 | 0.0002               |
| Fat                                   | -                       | -                          | -                      | -                          | -                       | -                       | -                    |
| Fiber                                 | 0.0057                  | -                          | -                      | -                          | -                       | -                       | -                    |
| <b>Diet Types</b>                     |                         |                            |                        |                            |                         |                         |                      |
| Canned-food                           | -                       | -                          | -                      | <0.0001                    | <0.0001                 | <0.0001                 | <0.0001              |
| High School                           | <0.0001                 | <0.0001                    | -                      | -                          | -                       | -                       | -                    |
| Japanese                              | -                       | -                          | -                      | -                          | -                       | <0.0001                 | <0.0001              |
| Chinese                               | <0.0001                 | -                          | <0.0001                | -                          | -                       | -                       | -                    |
| MR                                    | 0.2222                  | 0.1852                     | 0.1111                 | 0.0741                     | 0.1111                  | 0.0370                  | 0.1852               |
| AICc                                  | 35.7070                 | 29.7176                    | 27.0972                | 24.2056                    | 25.5887                 | 19.7628                 | 34.5265              |
| AUC                                   | 0.9091                  | 0.9056                     | 0.8971                 | 0.9176                     | 0.8892                  | 0.9659                  | 0.8750               |

Note. MR: misclassification rate; AICc: Akaike's information criterion with corrections; AUC: Area under the curve. Insignificant parameters are excluded: all calories ranges, pure liquid diet, fast food diet, Mexican diet, Italian diet, Mediterranean diet, American diet, Korean diet and smoothie-added diet.

**Supplementary Table S10.** Summary of significant factors contributing to the differences between Internet-based Application and Nutrition Data System for Research on other vitamins and minerals.

| Parameters                            | Vitamin A    | Vitamin D    | Vitamin E    | Vitamin C    | Calcium      | Magnesium    | Iron         | Sodium       |
|---------------------------------------|--------------|--------------|--------------|--------------|--------------|--------------|--------------|--------------|
|                                       | % Difference |
| <b>Energy Nutrients, % Difference</b> |              |              |              |              |              |              |              |              |
| Total calories                        | -            | -            | -            | -            | -            | 0.0012       | -            | -            |
| Protein                               | 0.0039       | -            | -            | -            | -            | 0.0101       | 0.0050       | -            |
| Fat                                   | -            | -            | 0.0032       | -            | -            | -            | -            | -            |
| Saturated Fat                         | -            | -            | -            | -            | -            | -            | -            | 0.0214       |
| Cholesterol                           | -            | 0.0002       | -            | -            | <0.0001      | -            | -            | -            |
| Fiber                                 | -            | -            | -            | 0.0042       | -            | 0.0325       | -            | -            |
| <b>Diet Types</b>                     |              |              |              |              |              |              |              |              |
| Canned-food                           | -            | <0.0001      | -            | -            | -            | <0.0001      | -            | -            |
| High School                           | -            | -            | -            | -            | -            | <0.0001      | <0.0001      | <0.0001      |
| Fast-food                             | -            | -            | <0.0001      | <0.0001      | -            | -            | -            | -            |
| Mexican                               | -            | -            | -            | 0.0247-      | 0.0154       | -            | -            | <0.0001      |
| Italian                               | -            | -            | <0.0001      | -            | -            | -            | -            | -            |
| Mediterranean                         | -            | <0.0001      | -            | -            | -            | -            | <0.0001      | -            |
| Chinese                               | -            | -            | -            | -            | <0.0001      | -            | -            | -            |
| Korean                                | <0.0001      | -            | -            | -            | -            | -            | -            | -            |
| Smoothie-added                        | <0.0001      | -            | -            | -            | -            | -            | -            | -            |
| MR                                    | 0.1852       | 0.1852       | 0.2222       | 0.2222       | 0.3333       | 0.2222       | 0.1111       | 0.2963       |
| AICc                                  | 31.1746      | 35.9705      | 37.1307      | 38.3823      | 41.7396      | 32.8717      | 33.4985      | 39.1133      |
| AUC                                   | 0.8516       | 0.8472       | 0.8040       | 0.8022       | 0.7250       | 0.8892       | 0.8977       | 0.7500       |

Note. MR: misclassification rate; AICc: Akaike's information criterion with corrections; AUC: Area under the curve. Insignificant parameters are excluded: all caloric ranges of <1000, 1000 – 2000, and >2000, pure liquid diet, canned food diet, American diet, and Japanese diet.

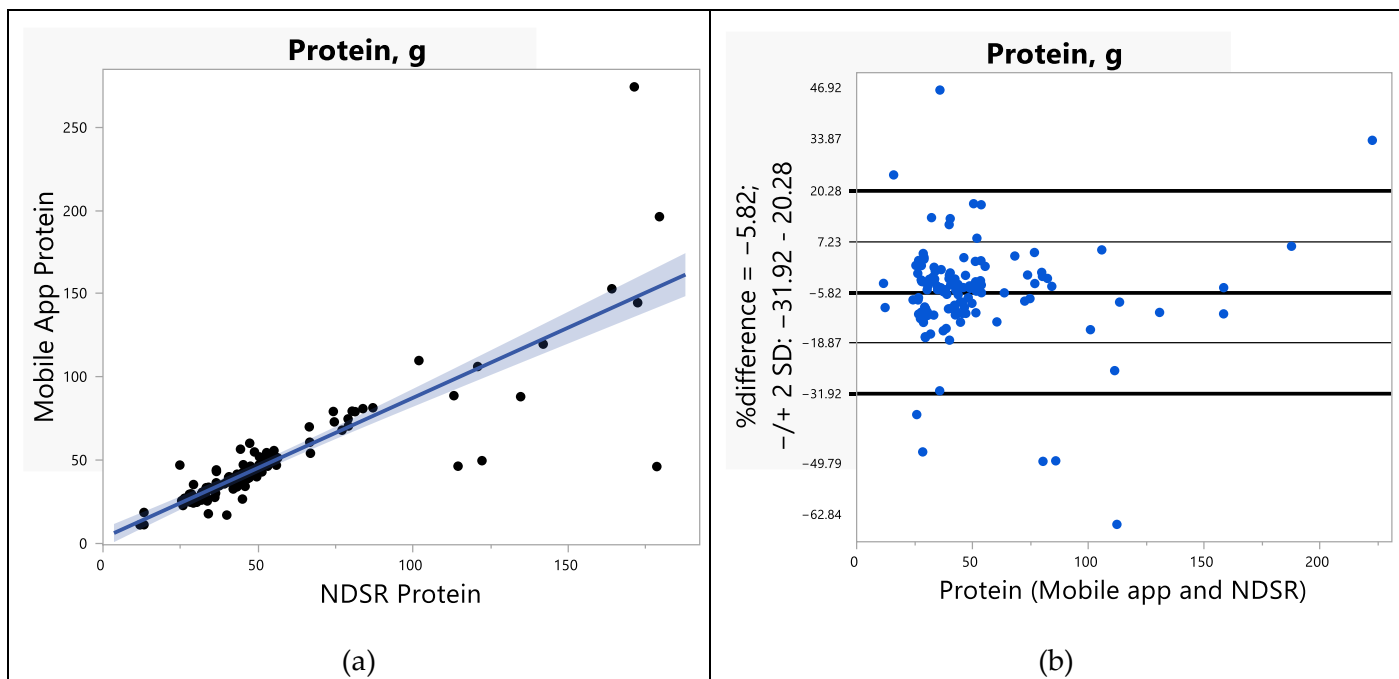

**Supplementary Figure S1.** (a) Correlation, (b) Bland-Altman plots between internet-based application and Nutrition Data System for Research (NDSR) for protein (a, b).

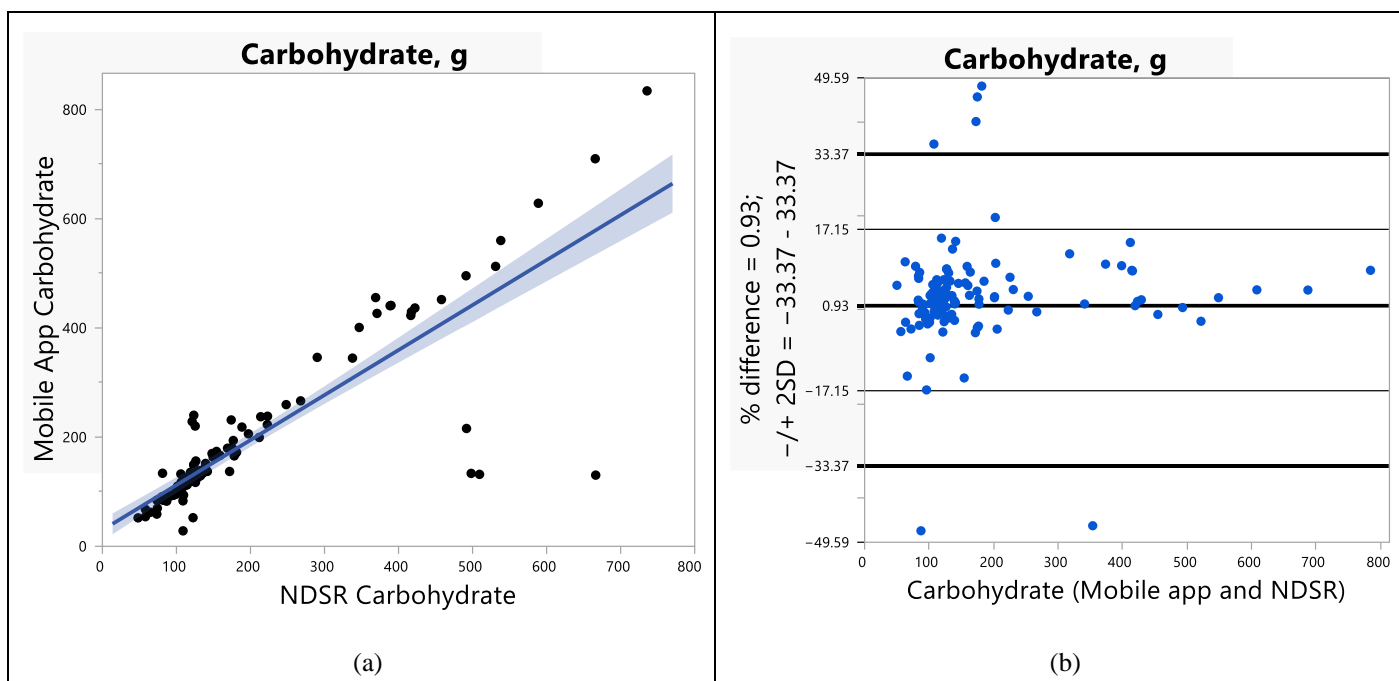

**Supplementary Figure S2.** (a) Correlation, (b) Bland-Altman plots between internet-based application and Nutrition Data System for Research (NDSR) for carbohydrate (a, b).
